# Supplementary material for: Regulation of the integrated hydrogen storage properties of magnesium hydride using 3D self-assembled amorphous carbon-embedded porous niobium pentoxide
Source: Royal Society of Chemistry journal article supplement (doi:10.1039/d2ta04700d), 2022-01-01
Supplement: d2ta04700d1.pdf [file d2ta04700d1.pdf]

---

Supporting Information

**Regulation of the integrated hydrogen storage properties of magnesium hydride using 3D self-assembled amorphous carbon-embedded porous niobium pentoxide**

Xiaobin Wen<sup>a</sup>, Hui ren Liang<sup>a</sup>, Ruolin Zhao<sup>a</sup>, Feifan Hong<sup>a</sup>, Weitao Shi<sup>a</sup>, Haizhen Liu<sup>a</sup>,

Haiqiang Chen<sup>b</sup>, Wenzheng Zhou<sup>a</sup>, Jin Guo, Zhiqiang Lan<sup>a, 1</sup>

<sup>a</sup> Guangxi Novel Battery Materials Research Center of Engineering Technology, Guangxi Colleges and Universities Key Laboratory of Novel Energy Materials and Related Technology, School of Physical Science and Technology, Guangxi University, Nanning 530004, PR China

<sup>b</sup> Nanning university, Nanning 530004, PR China

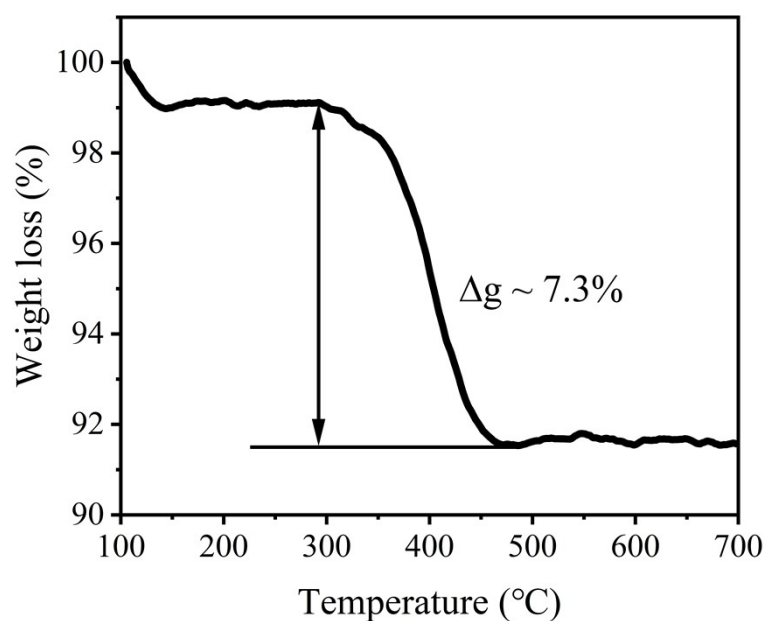

Fig. S1 TG curves of C-p-Nb<sub>2</sub>O<sub>5</sub> sample

---

<sup>1</sup> Corresponding author: E-mail: l\_zq1100@163..com (Zhiqiang Lan) .

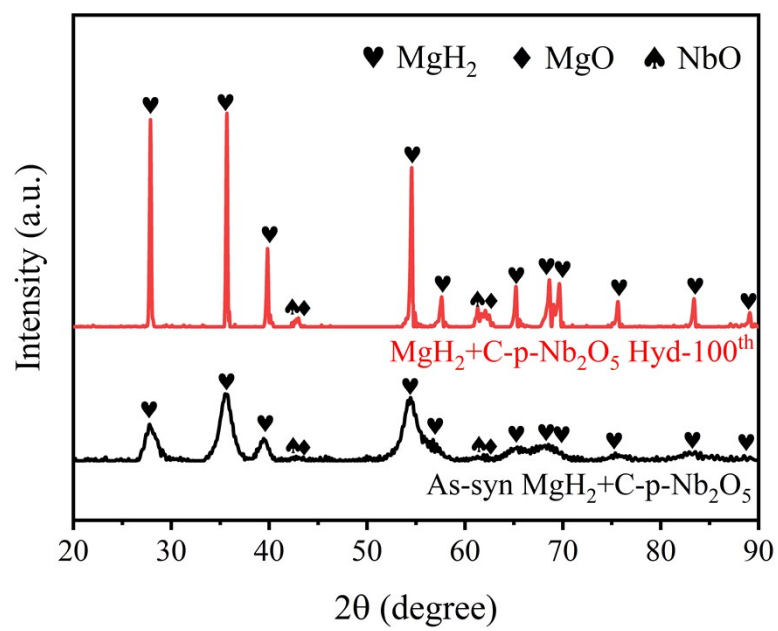

Fig. S2 XRD patterns of MgH<sub>2</sub>+C-p-Nb<sub>2</sub>O<sub>5</sub> sample
